# Supplementary material for: Enhanced Intestinal Permeability of Bufalin by a Novel Bufalin-Peptide-Dendrimer Inclusion through Caco-2 Cell Monolayer
Source: PubMed Central journal article supplement (PMC6149814; doi:10.3390/molecules22122088), 2017-11-29
Supplement: molecules-22-02088-s001.pdf [file molecules-22-02088-s001.pdf]

Table S. The intra-and inter-day precision and recovery of BFL

| Standard samples ( $\mu\text{M}$ ) | Intra-day              |                      | Inter-day              |         | Mean recovery <sup>b</sup> (%) |
|------------------------------------|------------------------|----------------------|------------------------|---------|--------------------------------|
|                                    | Mean ( $\mu\text{M}$ ) | RSD <sup>a</sup> (%) | Mean ( $\mu\text{M}$ ) | RSD (%) |                                |
| 1                                  | 0.98                   | 4.2                  | 0.96                   | 3.9     | 104.32                         |
| 5                                  | 4.85                   | 3.4                  | 4.75                   | 2.7     | 96.25                          |
| 10                                 | 9.65                   | 2.1                  | 9.58                   | 1.8     | 97.54                          |

<sup>a</sup> RSD (%) = (SD of amount detected/mean of amount detected)  $\times$  100

<sup>b</sup> Recovery (%) =  $100 \times (\text{detected amount} - \text{original amount})/\text{spiked amount}$ , data was presented as mean of three experiments
